# Supplementary material for: Factors affecting family planning among general surgery trainees
Source: Springer Nature journal article supplement (doi:10.1186/s12909-024-06435-6), 2025-04-26
Supplement: MOESM1 [file 12909_2024_6435_MOESM1_ESM.docx]

Family Planning in Medical Training Questions

1. Are you female or male?

-Female

-Male

-Other

-Prefer not to say

(Deleted original question #2, if you’re a med student, resident, fellow)

2. What is your level of training?

-Numeric

3. What is your age?

-Numeric

4. Do you any have any medical problems?

-Yes

-No

-Prefer not to say

-If yes, please specify (code same as yes)

5. I consider myself?

-Heterosexual

-Homosexual

-Bisexual

-Other (please specify)

**LGBT representation in surgery

6. What is your relationship status?

-Single

-In a relationship, not married

-Married

-Separated, not divorced

-Divorced

7. Do you have children?

-Yes

-No

-I’m currently pregnant

-If yes, how many children

8. What are your family planning goals?

-I want child(ren) in the next 1-5 years

-I want child(ren) in the next 5-10 years

-I want child(ren) in the next 10+ years

-I don't want children

-Unsure

9. Approximately how old will you be when you finish training and start practicing?

-20-25

-25-30

-30-35

-35-40

-40-45

-45-50

10. Are you pursing a fellowship after general surgery?

-Yes

-No

-If yes, what fellowship?

11. Rank the following factors based on how much they impacted your decision for fellowship:

-Length of Training

-Time commitment during fellowship

-Family Planning Goals (ie further delaying child-bearing)

-Job Opportunity

-Compensation

-Work life balance as an attending

-Other

12. How long is your anticipated residency/fellowship training duration in total? (answer in years)

13. How many hours is your average work week in your training program?

-0-40 hours

-40-60 hours

-60-80 hours

->80 hours

14. If you have a partner/spouse, how many hours is his/her average work week?

-0-40 hours

-40-60 hours

-60-80 hours

->80 hours

-I don’t have a partner/spouse

15. How much total combined income did all members of your HOUSEHOLD earn in 2019?

- Less than $50,000

- $50,000 to $74,999

- $75,000 to $150,000

- > $150,000

16. Does your institution cover egg freezing, or oocyte preservation for you or your partner?

-Full coverage

-Partial coverage

-No coverage

-I don’t know

-If partial, please give approximately what percentage (code same as 2)

17. If egg freezing was covered for you or your partner by your institution, is it something you would like to pursue?

-Yes

-No

-I’m not sure

18. How supportive has your program been in your family planning goals?

-Very supportive

-Somewhat supportive

-Neutral

-Somewhat unsupportive

-Very unsupportive

19. Presently, which of these factors have proposed a challenge to having children? (please rank, 1 as most prohibitive and 7 as least prohibitive, check N/A if not prohibitive at all) ***

-Cost

-Time

-Prohibitive career and/or education goals

-lack of personal support (e.g no stable or supportive partner, family)

-lack of program support

-Medical/Health factors

-Advanced Age

-N/A

20. Please answer yes, no, or unsure for the following?

A. Has anyone ever counseled you or your partner on family planning?

B. Has anyone ever counseled you or your partner on fertility preservation while in training?

C. Are you currently delaying having a child?

D. Have you or your partner considered undergoing fertility preservation?

21. Have you or your partner ever...

-Had difficulty getting pregnant/needed assistance in fertility?

-Received fertility treatment?

-Had a miscarriage or abortion?

-Decline to answer

22. Do you have a surgery mentor, with whom you feel comfortable discussing family planning?

23. What other factors have been prohibitive for fertility preservation and/or family planning?

24. Has the COVID-19 pandemic changed your family planning goals or treatment?

-Yes

-No

-If yes, please explain

25. Leave your email if you would like to discuss this topic more
